# Supplementary material for: Ist die Polytraumaversorgung im aG-DRG-System defizitär?
Source: Springer Nature journal article supplement (doi:10.1007/s00113-021-01015-5), 2021-06-08

|                         | Kostenpunkte                              | Gruppe<br>"Gesamt" | pro Patient<br>"Gesamt" | Gruppe<br>"ISS 9-15 + ITS" | pro Patient<br>"ISS 9-15 + ITS" | Gruppe<br>"ISS ≥ 16" | pro Patient<br>"ISS ≥ 16" | Gruppe<br>"DRG-Polytrauma" | pro Patienten<br>"DRG-Polytrauma" |                |
|-------------------------|-------------------------------------------|--------------------|-------------------------|----------------------------|---------------------------------|----------------------|---------------------------|----------------------------|-----------------------------------|----------------|
| Anzahl der Patienten    | n                                         | 258                |                         | 72                         |                                 | 186                  |                           | 59                         |                                   |                |
| Relativgewicht 2017*    |                                           | 1447,4             | 5,8                     | 485,9                      | 6,7                             | 961,4                | 5,5                       | 398,0                      | 6,7                               |                |
| Relativgewicht 2020*    |                                           | 1116,1             | 4,5                     | 367,3                      | 5,1                             | 748,8                | 4,3                       | 303,9                      | 5,2                               |                |
| Schockraum              | Dauer                                     | min                | 9631                    | 37,3                       | 2544                            | 35,3                 | 7087                      | 38,1                       | 2368                              | 40,1           |
|                         | Personal ÄD 2017                          | €                  | 93.355 €                | 362 €                      | 23.750 €                        | 330 €                | 69.605 €                  | 374 €                      | 24.055 €                          | 408 €          |
|                         | Personal ÄD 2020 (1)                      | €                  | 111.818 €               | 433 €                      | 28.448 €                        | 395 €                | 83.370 €                  | 448 €                      | 28.813 €                          | 488 €          |
|                         | Personal PD 2017                          | €                  | 14.637 €                | 57 €                       | 3.895 €                         | 54 €                 | 10.742 €                  | 58 €                       | 3.551 €                           | 60 €           |
|                         | Personal PD 2020 (2)                      | €                  | 16.111 €                | 62 €                       | 4.287 €                         | 60 €                 | 11.824 €                  | 64 €                       | 3.909 €                           | 66 €           |
|                         | Umverteilung Personalkosten 2017          | €                  | 186.977 €               | 725 €                      | 52.180 €                        | 725 €                | 134.798 €                 | 725 €                      | 42.758 €                          | 725 €          |
|                         | Umverteilung Personalkosten 2020 (1 u. 2) | €                  | 220.284 €               | 854 €                      | 61.475 €                        | 854 €                | 158.809 €                 | 854 €                      | 50.375 €                          | 854 €          |
|                         | Infrastruktur 2017                        | €                  | 30.761 €                | 119 €                      | 8.518 €                         | 118 €                | 22.243 €                  | 120 €                      | 6.980 €                           | 118 €          |
|                         | Infrastruktur 2020 (3)                    | €                  | 34.623 €                | 134 €                      | 9.662 €                         | 134 €                | 24.961 €                  | 134 €                      | 7.918 €                           | 134 €          |
|                         | Verbrauchsgüter 2017                      | €                  | 25.800 €                | 100 €                      | 7.200 €                         | 100 €                | 18.600 €                  | 100 €                      | 5.900 €                           | 100 €          |
|                         | Verbrauchsgüter 2020 (3)                  | €                  | 29.265 €                | 113 €                      | 8.167 €                         | 113 €                | 21.098 €                  | 113 €                      | 6.692 €                           | 113 €          |
|                         | <b>Modulkosten 2017</b>                   | €                  | <b>351.530 €</b>        | <b>1.363 €</b>             | <b>95.544 €</b>                 | <b>1.327 €</b>       | <b>255.987 €</b>          | <b>1.376 €</b>             | <b>83.245 €</b>                   | <b>1.411 €</b> |
| <b>Modulkosten 2020</b> | €                                         | <b>412.101 €</b>   | <b>1.597 €</b>          | <b>112.039 €</b>           | <b>1.556 €</b>                  | <b>300.062 €</b>     | <b>1.613 €</b>            | <b>97.707 €</b>            | <b>1.656 €</b>                    |                |
| OP                      | Anzahl der OPs                            | n                  | 457                     | 1,8                        | 89                              | 1,2                  | 368                       | 2,0                        | 156                               | 2,6            |
|                         | SN-Zeit                                   | min                | 37531                   | 145,5                      | 7184                            | 99,8                 | 30347                     | 163,2                      | 13491                             | 228,7          |
|                         | Anästhesie 2017                           | €                  | 313.173 €               | 1.214 €                    | 56.310 €                        | 782 €                | 256.863 €                 | 1.381 €                    | 112.349 €                         | 1.904 €        |
|                         | Anästhesie 2020 (3)                       | €                  | 355.232 €               | 1.377 €                    | 63.873 €                        | 887 €                | 291.359 €                 | 1.566 €                    | 127.438 €                         | 2.160 €        |
|                         | Peronsal ÄD Chirurgie 2017                | €                  | 122.994 €               | 477 €                      | 22.426 €                        | 311 €                | 100.568 €                 | 541 €                      | 46.457 €                          | 787 €          |
|                         | Peronsal ÄD Chirurgie 2020 (1)            | €                  | 146.570 €               | 568 €                      | 26.725 €                        | 371 €                | 119.846 €                 | 644 €                      | 55.363 €                          | 938 €          |
|                         | Peronsal PD Chirurgie 2017                | €                  | 61.318 €                | 238 €                      | 11.276 €                        | 157 €                | 50.043 €                  | 269 €                      | 22.839 €                          | 387 €          |
|                         | Peronsal PD Chirurgie 2020 (2)            | €                  | 67.493 €                | 262 €                      | 12.411 €                        | 172 €                | 55.082 €                  | 296 €                      | 25.139 €                          | 426 €          |
|                         | Material und Implantate 2017              | €                  | 437.588 €               | 1.696 €                    | 73.439 €                        | 1.020 €              | 364.149 €                 | 1.958 €                    | 127.209 €                         | 2.156 €        |
|                         | Material und Implantate 2020 (3)          | €                  | 496.356 €               | 1.924 €                    | 83.302 €                        | 1.157 €              | 413.054 €                 | 2.221 €                    | 144.293 €                         | 2.446 €        |
|                         | Infrastruktur 2017                        | €                  | 6.958 €                 | 27 €                       | 1.332 €                         | 18 €                 | 5.626 €                   | 30 €                       | 2.501 €                           | 42 €           |
|                         | Infrastruktur 2020 (3)                    | €                  | 7.893 €                 | 31 €                       | 1.511 €                         | 21 €                 | 6.382 €                   | 34 €                       | 2.837 €                           | 48 €           |
|                         | <b>Modulkosten 2017</b>                   | €                  | <b>942.031 €</b>        | <b>3.651 €</b>             | <b>164.783 €</b>                | <b>2.289 €</b>       | <b>777.248 €</b>          | <b>4.179 €</b>             | <b>311.355 €</b>                  | <b>5.277 €</b> |
| <b>Modulkosten 2020</b> | €                                         | <b>1.073.544 €</b> | <b>4.161 €</b>          | <b>187.821 €</b>           | <b>2.609 €</b>                  | <b>885.723 €</b>     | <b>4.762 €</b>            | <b>355.069 €</b>           | <b>6.018 €</b>                    |                |
| Intensivstation         | Behandlungstage Intensivstation           | d                  | 2032                    | 7,9                        | 196                             | 2,7                  | 1837                      | 9,9                        | 419                               | 7,1            |
|                         | Beatmungstage                             | d                  | 770                     | 3,0                        | 51                              | 0,7                  | 719                       | 3,9                        | 127                               | 2,1            |
|                         | <b>Modulkosten 2017</b>                   | €                  | <b>2.655.286 €</b>      | <b>10.292 €</b>            | <b>235.205 €</b>                | <b>3.267 €</b>       | <b>2.420.080 €</b>        | <b>13.011 €</b>            | <b>456.526 €</b>                  | <b>7.738 €</b> |
|                         | <b>Modulkosten 2020 (3)</b>               | €                  | <b>3.011.891 €</b>      | <b>11.674 €</b>            | <b>266.793 €</b>                | <b>3.705 €</b>       | <b>2.745.098 €</b>        | <b>14.759 €</b>            | <b>517.838 €</b>                  | <b>8.777 €</b> |
| Normalstation           | Behandlungstage                           | d                  | 2654                    | 10,3                       | 662                             | 9,2                  | 1992                      | 10,7                       | 673                               | 11,4           |
|                         | <b>Modulkosten 2017</b>                   | €                  | <b>1.202.458 €</b>      | <b>4.661 €</b>             | <b>297.126 €</b>                | <b>4.127 €</b>       | <b>905.332 €</b>          | <b>4.867 €</b>             | <b>307.017 €</b>                  | <b>5.204 €</b> |
|                         | <b>Modulkosten 2020 (3)</b>               | €                  | <b>1.363.949 €</b>      | <b>5.287 €</b>             | <b>337.030 €</b>                | <b>4.681 €</b>       | <b>1.026.919 €</b>        | <b>5.521 €</b>             | <b>348.249 €</b>                  | <b>5.903 €</b> |

|                                  |                                        |                     |                    |                  |                    |                     |                     |                   |                    |                 |
|----------------------------------|----------------------------------------|---------------------|--------------------|------------------|--------------------|---------------------|---------------------|-------------------|--------------------|-----------------|
| Sonstige<br>Behandlung<br>kosten | Radiologie und Nuklearmedizin 2017     | €                   | 291.948 €          | 1.132 €          | 51.652 €           | 717 €               | 240.296 €           | 1.292 €           | 65.895 €           | 1.117 €         |
|                                  | Radiologie und Nuklearmedizin 2020 (3) | €                   | 331.156 €          | 1.284 €          | 58.589 €           | 814 €               | 272.567 €           | 1.465 €           | 74.744 €           | 1.267 €         |
|                                  | C/M/V/P/I 2017                         | €                   | 120.066 €          | 465 €            | 17.895 €           | 249 €               | 102.171 €           | 549 €             | 24.608 €           | 417 €           |
|                                  | C/M/V/P/I 2020 (3)                     | €                   | 136.190 €          | 528 €            | 20.298 €           | 282 €               | 115.892 €           | 623 €             | 27.913 €           | 473 €           |
|                                  | Transfusionspräparate                  | n                   | 1034               | 4,0              | 18                 | 0,3                 | 1016                | 5,5               | 473                | 8,0             |
|                                  | Transfusionsmedizin 2017               | €                   | 146.029 €          | 566 €            | 7.682 €            | 107 €               | 138.348 €           | 744 €             | 44.769 €           | 759 €           |
|                                  | Transfusionsmedizin 2020 (3)           | €                   | 165.641 €          | 642 €            | 8.713 €            | 121 €               | 156.928 €           | 844 €             | 50.782 €           | 861 €           |
|                                  | Ärztliche Konsile 2017                 | €                   | 38.712 €           | 150 €            | 10.628 €           | 148 €               | 28.084 €            | 151 €             | 10.404 €           | 176 €           |
|                                  | Ärztliche Konsile 2020 (1)             | €                   | 46.133 €           | 179 €            | 12.666 €           | 176 €               | 33.467 €            | 180 €             | 12.398 €           | 210 €           |
|                                  | P/E/L 2017                             | €                   | 69.806 €           | 271 €            | 10.994 €           | 153 €               | 58.812 €            | 316 €             | 17.912 €           | 304 €           |
|                                  | P/E/L 2020 (2)                         | €                   | 76.835 €           | 298 €            | 12.101 €           | 168 €               | 64.735 €            | 348 €             | 19.715 €           | 334 €           |
|                                  | <b>Modulkosten 2017</b>                | <b>€</b>            | <b>666.561 €</b>   | <b>2.584 €</b>   | <b>98.851 €</b>    | <b>1.373 €</b>      | <b>567.710 €</b>    | <b>3.052 €</b>    | <b>163.587 €</b>   | <b>2.773 €</b>  |
|                                  | <b>Modulkosten 2020</b>                | <b>€</b>            | <b>755.956 €</b>   | <b>2.930 €</b>   | <b>112.367 €</b>   | <b>1.561 €</b>      | <b>643.589 €</b>    | <b>3.460 €</b>    | <b>185.553 €</b>   | <b>3.145 €</b>  |
| Overhead                         | Z/D/O 2017                             | €                   | 108.513 €          | 421 €            | 30.283 €           | 421 €               | 78.230 €            | 421 €             | 24.815 €           | 421 €           |
|                                  | Z/D/O 2020 (4)                         | €                   | 125.223 €          | 485 €            | 34.946 €           | 485 €               | 90.277 €            | 485 €             | 28.636 €           | 485 €           |
|                                  | Kosten Traumahandy 2017                | €                   | 25.467 €           | 99 €             | 7.107 €            | 99 €                | 18.360 €            | 99 €              | 5.824 €            | 99 €            |
|                                  | Kosten Traumahandy 2020 (1)            | €                   | 30.349 €           | 118 €            | 8.469 €            | 118 €               | 21.880 €            | 118 €             | 6.940 €            | 118 €           |
|                                  | <b>Modulkosten 2017</b>                | <b>€</b>            | <b>133.980 €</b>   | <b>519 €</b>     | <b>37.390 €</b>    | <b>519 €</b>        | <b>96.590 €</b>     | <b>519 €</b>      | <b>30.639 €</b>    | <b>519 €</b>    |
|                                  | <b>Modulkosten 2020</b>                | <b>€</b>            | <b>155.572 €</b>   | <b>603 €</b>     | <b>43.415 €</b>    | <b>603 €</b>        | <b>112.156 €</b>    | <b>603 €</b>      | <b>35.577 €</b>    | <b>603 €</b>    |
| Gesamt                           | <b>Gesamtkosten 2017</b>               | <b>€</b>            | <b>5.951.846 €</b> | <b>23.069 €</b>  | <b>928.899 €</b>   | <b>12.901 €</b>     | <b>5.022.947 €</b>  | <b>27.005 €</b>   | <b>1.352.370 €</b> | <b>22.922 €</b> |
|                                  | <b>Gesamtkosten 2020</b>               | <b>€</b>            | <b>6.773.014 €</b> | <b>26.252 €</b>  | <b>1.059.467 €</b> | <b>14.715 €</b>     | <b>5.713.547 €</b>  | <b>30.718 €</b>   | <b>1.539.992 €</b> | <b>26.102 €</b> |
|                                  | Kostenschätzer 2017                    | €                   | 6.245.698 €        | 24.208 €         | 1.886.547 €        | 26.202 €            | 4.359.151 €         | 23.436 €          | 1.500.816 €        | 25.438 €        |
|                                  | Kostenschätzer 2020                    | €                   | 6.811.194 €        | 26.400 €         | 2.057.358 €        | 28.574 €            | 4.753.836 €         | 25.558 €          | 1.636.703 €        | 27.741 €        |
|                                  | <b>Gesamterlös 2017</b>                | <b>€</b>            | <b>5.094.492 €</b> | <b>19.746 €</b>  | <b>1.675.621 €</b> | <b>23.273 €</b>     | <b>3.418.871 €</b>  | <b>18.381 €</b>   | <b>1.377.611 €</b> | <b>23.349 €</b> |
|                                  | <b>Gesamterlös 2020</b>                | <b>€</b>            | <b>5.261.526 €</b> | <b>20.394 €</b>  | <b>1.720.960 €</b> | <b>23.902 €</b>     | <b>3.540.567 €</b>  | <b>19.035 €</b>   | <b>1.423.096 €</b> | <b>24.120 €</b> |
|                                  | Teilerlös 2020 ohne Pflege und ZE/ZP   | €                   | 3.729.592 €        | 14.456 €         | 1.227.296 €        | 17.046 €            | 2.502.296 €         | 13.453 €          | 1.015.510 €        | 17.212 €        |
|                                  | Teilerlös 2020 Pflege                  | €                   | 1.289.213 €        | 4.997 €          | 446.108 €          | 6.196 €             | 843.105 €           | 4.533 €           | 363.588 €          | 6.163 €         |
|                                  | Teilerlös 2020 Zusatzentgelte          | €                   | 121.143 €          | 470 €            | 35.398 €           | 492 €               | 85.744 €            | 461 €             | 31.840 €           | 540 €           |
|                                  | <b>2017</b>                            | <b>€</b>            | <b>-857.355 €</b>  | <b>-3.323 €</b>  | <b>746.722 €</b>   | <b>10.371 €</b>     | <b>-1.604.077 €</b> | <b>-8.624 €</b>   | <b>25.241 €</b>    | <b>428 €</b>    |
| <b>2020</b>                      | <b>€</b>                               | <b>-1.511.488 €</b> | <b>-5.858 €</b>    | <b>661.493 €</b> | <b>9.187 €</b>     | <b>-2.172.981 €</b> | <b>-11.683 €</b>    | <b>-116.895 €</b> | <b>-1.981 €</b>    |                 |

Ausführliche Darstellung der Tabelle 2. Kosten und Erlöse im Jahr 2017 und 2020 sowie in den einzelnen Subgruppen. \*Die zehn Patienten mit der Diagnose B61B sind nicht berücksichtigt. Jährliche Steigerungsraten: (1) Personalkosten ÄD: 6,20 %, (2) Personalkosten PD: 3,25 %, (3) Sachkosten: 4,29 %, (4) Z/D/O-Kosten 4,89 %. C/M/V/P/I - Klinische Chemie, Mikrobiologie, Virologie, Pathologie und Immunologie, P/E/L - Physio- / Ergotherapie und Logopädie, Z/D/O - Zertifizierung-, Dokumentations- und Organisationskosten.

|     | <b>Gesamt</b> | <b>ISS 9-15+ITS</b> | <b>ISS ≥16 i-Polytrauma</b> |       |
|-----|---------------|---------------------|-----------------------------|-------|
| SR  | 2,8%          | 4,8%                | 2,5%                        | 3,1%  |
| ÜT  | 3,3%          | 5,8%                | 2,8%                        | 3,3%  |
| OP  | 15,9%         | 17,7%               | 15,5%                       | 23,1% |
| ITS | 44,5%         | 25,2%               | 48,0%                       | 33,6% |
| NS  | 20,1%         | 31,8%               | 18,0%                       | 22,6% |
| SB  | 11,2%         | 10,6%               | 11,3%                       | 12,0% |
| OH  | 2,3%          | 4,1%                | 2,0%                        | 2,3%  |

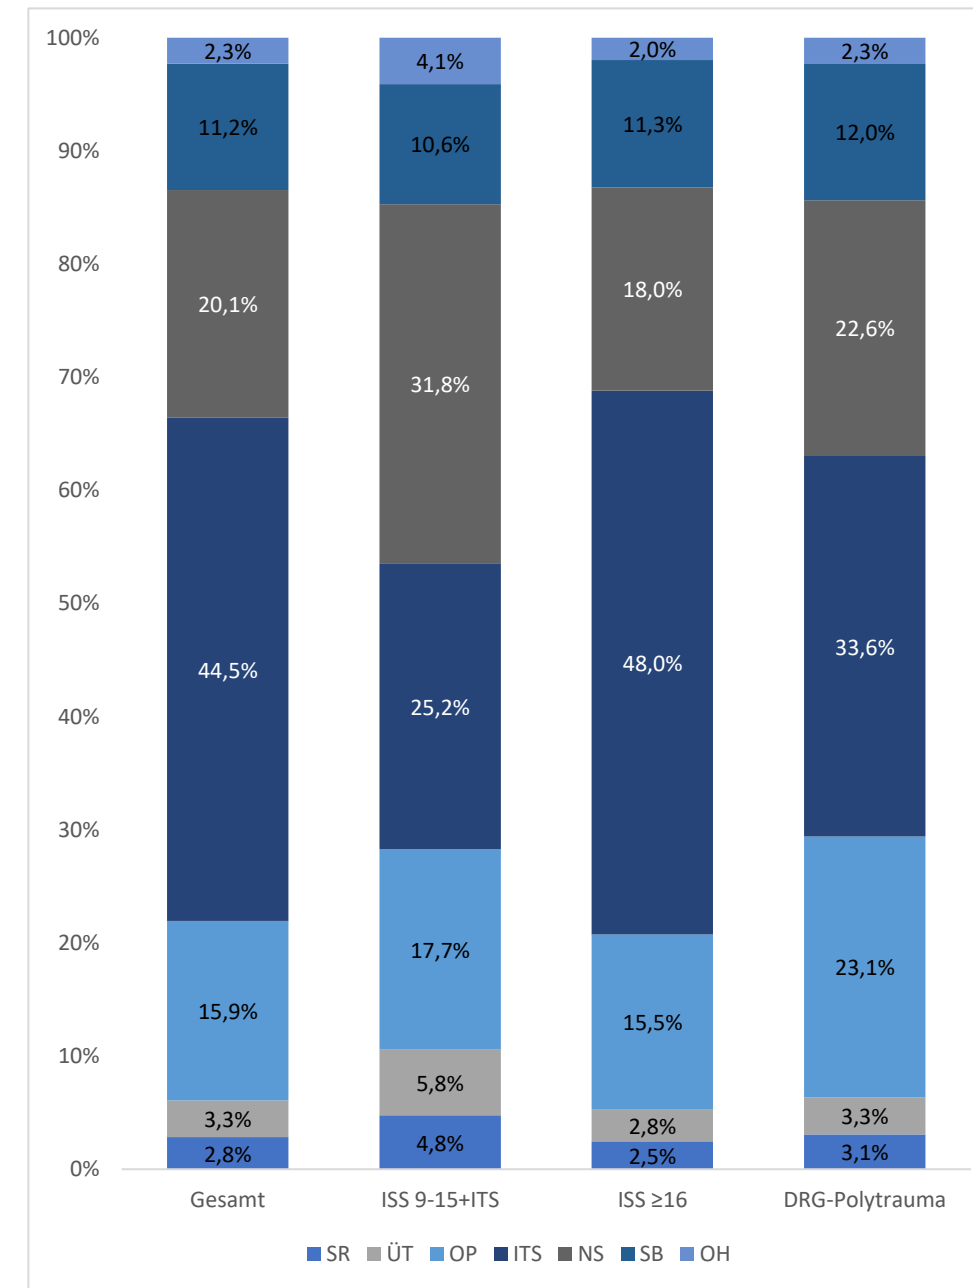

Supplement: MOESM7 [file 19239702]
