# Supplementary material for: Ist die Polytraumaversorgung im aG-DRG-System defizitär?
Source: Springer Nature journal article supplement (doi:10.1007/s00113-021-01015-5), 2021-06-08
Supplement: MOESM1 [file 19239702]

| DRG  | Jahr                                                                                                                                                                                                                             | Bewertungsrelation bei Hauptabteilung | Mittlere     | Untere Grenzverweildauer   |                             | Obere Grenzverweildauer    |                             | Pflegerlös<br>Bewertungs-<br>relation/Tag |  |
|------|----------------------------------------------------------------------------------------------------------------------------------------------------------------------------------------------------------------------------------|---------------------------------------|--------------|----------------------------|-----------------------------|----------------------------|-----------------------------|-------------------------------------------|--|
|      |                                                                                                                                                                                                                                  |                                       | Verweildauer | Erster Tag mit<br>Abschlag | Bewertungs-<br>relation/Tag | Erster Tag<br>zus. Entgelt | Bewertungs-<br>relation/Tag |                                           |  |
| W01B | Polytrauma mit Beatmung > 72 Stunden oder komplexen Eingriffen oder IntK > 392 / 368 / 552 Aufwandspunkte, ohne Frührehabilitation, mit Beatmung > 263 Stunden oder mit komplexer Vakuumbehandlung oder mit IntK > 588 / 552 / - |                                       |              |                            |                             |                            |                             |                                           |  |
|      | 2020                                                                                                                                                                                                                             | 10,454                                | 25,9         | 8                          | 0,773                       | 44                         | 0,268                       | 2,7119                                    |  |
|      | 2019                                                                                                                                                                                                                             | 14,288                                | 31,6         | 10                         | 0,941                       | 50                         | 0,331                       | Seit aG-DRG<br>2020                       |  |
|      | 2018                                                                                                                                                                                                                             | 14,563                                | 31,7         | 10                         | 0,973                       | 50                         | 0,338                       |                                           |  |
|      | 2017                                                                                                                                                                                                                             | 14,648                                | 31,7         | 10                         | 0,996                       | 50                         | 0,346                       |                                           |  |
| W01C | Polytrauma mit Beatmung > 72 Stunden oder komplexen Eingriffen oder IntK > 392 / 368 / 552 Aufwandspunkte, ohne Frührehabilita                                                                                                   |                                       |              |                            |                             |                            |                             |                                           |  |
|      | 2020                                                                                                                                                                                                                             | 3,968                                 | 13,8         | 4                          | 0,609                       | 28                         | 0,222                       | 2,2879                                    |  |
|      | 2019                                                                                                                                                                                                                             | 7,107                                 | 18,4         | 5                          | 0,934                       | 34                         | 0,305                       | Seit aG-DRG<br>2020                       |  |
|      | 2018                                                                                                                                                                                                                             | 7,852                                 | 18,5         | 5                          | 0,99                        | 35                         | 0,32                        |                                           |  |
|      | 2017                                                                                                                                                                                                                             | 8,051                                 | 21           | 6                          | 0,87                        | 38                         | 0,298                       |                                           |  |
| W02A | Polytrauma mit anderen komplexen Eingriffen mit komplizierender Konstellation oder Eingriffen an mehreren Lokalisationen oder mi                                                                                                 |                                       |              |                            |                             |                            |                             |                                           |  |
|      | 2020                                                                                                                                                                                                                             | 7,974                                 | 25,3         | 7                          | 0,498                       | 43                         | 0,11                        | 1,6205                                    |  |
|      | 2019                                                                                                                                                                                                                             | 8,989                                 | 23,7         | 7                          | 0,644                       | 42                         | 0,152                       | Seit aG-DRG<br>2020                       |  |
|      | 2018                                                                                                                                                                                                                             | 8,142                                 | 22,9         | 7                          | 0,556                       | 40                         | 0,136                       |                                           |  |
|      | 2017                                                                                                                                                                                                                             | 7,782                                 | 22           | 6                          | 0,613                       | 39                         | 0,136                       |                                           |  |
| W02B | Polytrauma mit anderen komplexen Eingriffen ohne komplizierende Konstellation, ohne Eingriffe an mehreren Lokalisationen, ohne in                                                                                                |                                       |              |                            |                             |                            |                             |                                           |  |
|      | 2020                                                                                                                                                                                                                             | 4,636                                 | 17,3         | 5                          | 0,409                       | 32                         | 0,099                       | 1,3987                                    |  |
|      | 2019                                                                                                                                                                                                                             | 5,615                                 | 18,1         | 5                          | 0,572                       | 33                         | 0,133                       | Seit aG-DRG<br>2020                       |  |
|      | 2018                                                                                                                                                                                                                             | 4,671                                 | 16,8         | 5                          | 0,489                       | 31                         | 0,123                       |                                           |  |
|      | 2017                                                                                                                                                                                                                             | 4,853                                 | 17,3         | 5                          | 0,509                       | 33                         | 0,123                       |                                           |  |
| W04A | Polytrauma mit anderen Eingriffen oder Beatmung > 24 Stunden, mit komplizierender Konstellation oder Eingriffen an mehreren Loka                                                                                                 |                                       |              |                            |                             |                            |                             |                                           |  |
|      | 2020                                                                                                                                                                                                                             | 5,22                                  | 18,2         | 5                          | 0,464                       | 33                         | 0,107                       | 1,5646                                    |  |
|      | 2019                                                                                                                                                                                                                             | 6,641                                 | 19,9         | 6                          | 0,573                       | 35                         | 0,141                       | Seit aG-DRG<br>2020                       |  |
|      | 2018                                                                                                                                                                                                                             | 6,846                                 | 21,1         | 6                          | 0,583                       | 37                         | 0,136                       |                                           |  |
|      | 2017                                                                                                                                                                                                                             | 6,093                                 | 19,9         | 6                          | 0,52                        | 36                         | 0,128                       |                                           |  |
| W04B | Polytrauma mit anderen Eingriffen oder Beatmung > 24 Stunden, ohne komplizierende Konstellation, ohne Eingriffe an mehreren Loka                                                                                                 |                                       |              |                            |                             |                            |                             |                                           |  |
|      | 2020                                                                                                                                                                                                                             | 3,087                                 | 14,5         | 4                          | 0,375                       | 28                         | 0,091                       | 1,213                                     |  |
|      | 2019                                                                                                                                                                                                                             | 3,729                                 | 14,5         | 4                          | 0,523                       | 28                         | 0,126                       | Seit aG-DRG<br>2020                       |  |
|      | 2018                                                                                                                                                                                                                             | 3,688                                 | 14,7         | 4                          | 0,522                       | 29                         | 0,124                       |                                           |  |
|      | 2017                                                                                                                                                                                                                             | 3,769                                 | 14,8         | 4                          | 0,537                       | 28                         | 0,127                       |                                           |  |
| W04C | Polytrauma mit anderen Eingriffen oder Beatmung > 24 Stunden, ohne komplizierende Konstellation, ohne Eingriffe an mehreren Loka                                                                                                 |                                       |              |                            |                             |                            |                             |                                           |  |
|      | 2020                                                                                                                                                                                                                             | 2,02                                  | 11,5         | 3                          | 0,327                       | 23                         | 0,079                       | 1,1964                                    |  |
|      | 2019                                                                                                                                                                                                                             | 2,23                                  | 8,9          | 2                          | 0,519                       | 16                         | 0,123                       | Seit aG-DRG<br>2020                       |  |
|      | 2018                                                                                                                                                                                                                             | Seit G-DRG 2019                       |              |                            |                             |                            |                             |                                           |  |
|      | 2017                                                                                                                                                                                                                             |                                       |              |                            |                             |                            |                             |                                           |  |
| W36Z | Intensivmedizinische Komplexbehandlung > 784 / 828 / 828 Aufwandspunkte bei Polytrauma oder Polytrauma mit Beatmung oder Kra                                                                                                     |                                       |              |                            |                             |                            |                             |                                           |  |
|      | 2020                                                                                                                                                                                                                             | 11,477                                | 29,7         | 9                          | 0,841                       | 48                         | 0,283                       | 3,174                                     |  |
|      | 2019                                                                                                                                                                                                                             | 17,028                                | 30,8         | 9                          | 1,35                        | 49                         | 0,438                       | Seit aG-DRG<br>2020                       |  |
|      | 2018                                                                                                                                                                                                                             | 16,423                                | 32           | 10                         | 1,204                       | 50                         | 0,415                       |                                           |  |
|      | 2017                                                                                                                                                                                                                             | 16,423                                | 32           | 10                         | 1,204                       | 50                         | 0,415                       |                                           |  |
| W60Z | Polytrauma, verstorben < 5 Tage nach Aufnahme, ohne komplizierende Konstellationen, ohne Beatmung > 24 Stunden, ohne komplex                                                                                                     |                                       |              |                            |                             |                            |                             |                                           |  |
|      | 2020                                                                                                                                                                                                                             | 0,624                                 | 1,2          |                            |                             |                            |                             | 1,5648                                    |  |
|      | 2019                                                                                                                                                                                                                             | 1,804                                 | 1,6          | Nicht vorgesehen           |                             |                            |                             | Seit aG-DRG<br>2020                       |  |
|      | 2018                                                                                                                                                                                                                             | 2,059                                 | 1,6          |                            |                             |                            |                             |                                           |  |
|      | 2017                                                                                                                                                                                                                             | 2,058                                 | 1,5          |                            |                             |                            |                             |                                           |  |
| W61A | Polytrauma ohne signifikante Eingriffe mit komplizierender Diagnose oder mit intensivmedizinischer Komplexbehandlung > 196 / 184                                                                                                 |                                       |              |                            |                             |                            |                             |                                           |  |
|      | 2020                                                                                                                                                                                                                             | 1,725                                 | 11,2         | 3                          | 0,418                       | 24                         | 0,105                       | 1,4328                                    |  |
|      | 2019                                                                                                                                                                                                                             | 2,072                                 | 10           | 2                          | 0,666                       | 21                         | 0,14                        | Seit aG-DRG<br>2020                       |  |
|      | 2018                                                                                                                                                                                                                             | 2,127                                 | 10,2         | 2                          | 0,689                       | 22                         | 0,142                       |                                           |  |
|      | 2017                                                                                                                                                                                                                             | 2,114                                 | 10,6         | 3                          | 0,516                       | 22                         | 0,136                       |                                           |  |
| W61B | Polytrauma ohne signifikante Eingriffe, ohne komplizierende Diagnose, ohne intensivmedizinische Komplexbehandlung > 196 / 184 / -                                                                                                |                                       |              |                            |                             |                            |                             |                                           |  |
|      | 2020                                                                                                                                                                                                                             | 1,161                                 | 8,7          | 2                          | 0,374                       | 18                         | 0,09                        | 1,0873                                    |  |
|      | 2019                                                                                                                                                                                                                             | 1,656                                 | 9,5          | 2                          | 0,537                       | 21                         | 0,118                       | Seit aG-DRG<br>2020                       |  |
|      | 2018                                                                                                                                                                                                                             | 1,737                                 | 9,9          | 2                          | 0,565                       | 21                         | 0,12                        |                                           |  |
|      | 2017                                                                                                                                                                                                                             | 1,631                                 | 9,2          | 2                          | 0,53                        | 20                         | 0,121                       |                                           |  |

MDC 21A Polytrauma.

Auszüge der Fallpauschalenkataloge 2017-2020 des InEKs (4-7). Bezeichnungen entsprechend des Fallpauschalenkatalogs 2020.
