# Supplementary material for: Ist die Polytraumaversorgung im aG-DRG-System defizitär?
Source: Springer Nature journal article supplement (doi:10.1007/s00113-021-01015-5), 2021-06-08
Supplement: MOESM2 [file 19239702]

| Jahr                                  | Kosten je Behandlungsfall | Personalkosten im Pflegedienst | Personalkosten im ärztlichen | Sachkosten   |
|---------------------------------------|---------------------------|--------------------------------|------------------------------|--------------|
| 2020*                                 | 5.120 €                   | 21.088 Mio. €                  | 24.363 Mio. €                | 44,4 Mrd. €  |
| 2019*                                 | 4.974 €                   | 20.424 Mio. €                  | 22.980 Mio. €                | 42,5 Mrd. €  |
| 2018*                                 | 4.833 €                   | 19.781 Mio. €                  | 21.675 Mio. €                | 40,8 Mrd. €  |
| <b>Gemittelte Steigerung pro Jahr</b> | <b>2,93%</b>              | <b>3,25%</b>                   | <b>6,02%</b>                 | <b>4,29%</b> |
| 2017                                  | 4.695 €                   | 19.158 Mio. €                  | 20.445 Mio. €                | 39,1 Mrd. €  |
| 2016                                  | 4.497 €                   | 18.359 Mio. €                  | 19.512 Mio. €                | 37,9 Mrd. €  |
| 2015                                  | 4.378 €                   | 17.751 Mio. €                  | 18.537 Mio. €                | 36,2 Mrd. €  |
| 2014                                  | 4.239 €                   | 17.098 Mio. €                  | 17.578 Mio. €                | 35,0 Mrd. €  |
| 2013                                  | 4.152 €                   | 16.510 Mio. €                  | 16.671 Mio. €                | 33,8 Mrd. €  |
| 2012                                  | 4.060 €                   | 16.181 Mio. €                  | 15.768 Mio. €                | 32,6 Mrd. €  |
| 2011                                  | 3.960 €                   | 15.707 Mio. €                  | 14.729 Mio. €                | 31,7 Mrd. €  |
| 2010                                  | 3.862 €                   | 15.150 Mio. €                  | 13.901 Mio. €                | 30,3 Mrd. €  |
| 2009                                  | 3.771 €                   | 14.805 Mio. €                  | 13.048 Mio. €                | 29,2 Mrd. €  |
| 2008                                  | 3.609 €                   | 14.232 Mio. €                  | 12.117 Mio. €                | 27,3 Mrd. €  |
| 2007                                  | 3.518 €                   | 13.916 Mio. €                  | 11.400 Mio. €                | 25,7 Mrd. €  |

Kostenentwicklung in deutschen Krankenhäusern.

Gemittelte prozentuale Steigerung anhand der Daten von 2007-2017.

\* Prognostizierte Kosten
