# Supplementary material for: Ist die Polytraumaversorgung im aG-DRG-System defizitär?
Source: Springer Nature journal article supplement (doi:10.1007/s00113-021-01015-5), 2021-06-08
Supplement: MOESM3 [file 19239702]

| Dienstgruppe      | SL 2017 | SL 2018* | SL 2019* | SL 2020* |
|-------------------|---------|----------|----------|----------|
| Ärztlicher Dienst | 63,26 € | 67,07 €  | 71,11 €  | 75,39 €  |
| Pflegedienst      | 32,24 € | 33,29 €  | 34,38 €  | 35,49 €  |

Stundenlohn [SL] pro Mitarbeiter des ärztlichen Dienstes und Pflegedienstes.

\* Prognostizierte Kosten
