# Supplementary material for: Ist die Polytraumaversorgung im aG-DRG-System defizitär?
Source: Springer Nature journal article supplement (doi:10.1007/s00113-021-01015-5), 2021-06-08
Supplement: MOESM4 [file 19239702]

|                       | 2017*          | 2018*          | 2019           | 2020*          |
|-----------------------|----------------|----------------|----------------|----------------|
| <b>Betriebskosten</b> | 1.509,01 €     | 1.573,74 €     | 1.641,26 €     | 1.711,67 €     |
| <b>Reinigung</b>      | 7.412,67 €     | 7.730,67 €     | 8.062,32 €     | 8.408,19 €     |
| <b>Energie</b>        | 2.012,85 €     | 2.099,20 €     | 2.189,26 €     | 2.283,17 €     |
| <b>Medizintechnik</b> | 12.675,73 €    | 13.219,52 €    | 13.786,64 €    | 14.378,08 €    |
| <b>Kaltniete</b>      | 6.088,98 €     | 6.350,20 €     | 6.622,62 €     | 6.906,73 €     |
| <b>Gesamtkosten</b>   | 30.524,32 €    | 31.833,81 €    | 33.199,48 €    | 34.623,74 €    |
| <b>pro SR-Patient</b> | <b>36,60 €</b> | <b>38,17 €</b> | <b>39,81 €</b> | <b>41,52 €</b> |

Jährliche Infrastrukturkosten des chirurgischen Schockraums am UKL. Betriebskosten inklusive Gebäudetechnik und -wartung. Reinigung laut Subunternehmen 14 €/m<sup>2</sup> Monat. Energie (Strom, Wasser, Wärme). Medizintechnik beinhaltet Reparatur, Material, Wartung und Prüfung von 1,0 Patientenmonitor, 1,0 Narkose-Beatmungsgerät, 2,0 Infusionsspritzenpumpen, 0,5 Ultraschallgerät, 1,0 Defibrillator, 1,0 OP-Leuchte, 1,0 Patientenstretcher, 1,0 Endoskop, 0,5 BGA-Gerät, 1,0 EKG-Gerät. Kaltniete entspricht der Angesetzten Miete des Medizinischen Versorgungszentrums am UKL. \* Prognostizierte Kosten.
