# Supplementary material for: Ist die Polytraumaversorgung im aG-DRG-System defizitär?
Source: Springer Nature journal article supplement (doi:10.1007/s00113-021-01015-5), 2021-06-08
Supplement: MOESM5 [file 19239702]

| Kostenposition                       | anteilige<br>Wochenstunden <sup>1</sup> | Jahresbetrag<br>Wert in € | Anteiliger<br>Jahreswert in € <sup>2</sup> |
|--------------------------------------|-----------------------------------------|---------------------------|--------------------------------------------|
| <b>Personalkosten</b>                |                                         |                           |                                            |
| - Dokumentationskraft                | 40 / 40 h                               | 42.565,30 €               | 42.565,30 €                                |
| - Assistenzarzt                      | 10 / 42 h                               | 93.305,88 €               | 22.215,69 €                                |
| - Oberarzt                           | 4 / 42 h                                | 158.500,73 €              | 15.095,31 €                                |
| <b>Investitions- und Sachaufwand</b> |                                         |                           |                                            |
| - Jahresbeitrag TraumaRegister DGU®  | jährlich                                | 595,00 €                  | 595,00 €                                   |
| - Zertifizierungskosten              | 3-jährlich                              | 5.950,00 €                | 1.983,33 €                                 |
| - begleitende Reisekosten            | 3-jährlich                              | 260,00 €                  | 86,67 €                                    |
| <b>Sonstige Kosten<sup>3</sup></b>   | jährlich                                |                           | 25.971,63 €                                |
| <b>Gesamtaufwand im Jahr 2017</b>    |                                         |                           | <b>108.512,92 €</b>                        |

Kalkulation des Mehraufwands des Traumazentrum am Beispiel 2017.

<sup>1</sup>Anteilige Wochenstundenzahl bei Personal. <sup>2</sup>Inkl. Tarifierhöhung 2017 bei Personalkosten.

<sup>3</sup>Sonstige Kosten als Oberbegriff für beispielsweise Raum-, Unterhaltungskosten, Organisationskosten, Inanspruchnahme Klinikdirektor und Sekretariat.
