# Supplementary material for: Ist die Polytraumaversorgung im aG-DRG-System defizitär?
Source: Springer Nature journal article supplement (doi:10.1007/s00113-021-01015-5), 2021-06-08
Supplement: MOESM6 [file 19239702]

|                     | 2010 | 2011 | 2012 | 2013 | 2014 | 2015 | 2016 | 2017 | 2018 | 2019 | 2020* |
|---------------------|------|------|------|------|------|------|------|------|------|------|-------|
| <b>LBFW Sachsen</b> | 2864 | 2884 | 2958 | 3013 | 3117 | 3191 | 3278 | 3342 | 3439 | 3529 | 3612  |
| <b>BBFW</b>         | 2936 | 2964 | 2992 | 3068 | 3157 | 3231 | 3312 | 3376 | 3467 | 3545 | 3625  |

Basisfallwerte 2010-2020.

LBFW - Landesbasisfallwert, BBFW - Bundesbasisfallwert. Mittlere Steigerungsrate 2010-2019: LBFW Sachsen 2,35 %, BBFW 2,27 %.
