# Supplementary material for: Ist die Polytraumaversorgung im aG-DRG-System defizitär?
Source: Springer Nature journal article supplement (doi:10.1007/s00113-021-01015-5), 2021-06-08
Supplement: MOESM8 [file 19239702]

| <b>Prädiktorvariable</b>                                                 | <b>KW 2008</b> | <b>KW 2017*</b> | <b>KW 2018*</b> | <b>KW 2019*</b> | <b>KW 2020*</b> |
|--------------------------------------------------------------------------|----------------|-----------------|-----------------|-----------------|-----------------|
| Anzahl der Tage auf Intensivstation x                                    | 1.152 €        | 1.537 €         | 1.582 €         | 1.629 €         | 1.677 €         |
| + Anzahl der Tage mit Intubation x                                       | 568 €          | 758 €           | 780 €           | 803 €           | 827 €           |
| + Anzahl der Tage auf Normalstation x                                    | 531 €          | 709 €           | 729 €           | 751 €           | 773 €           |
| + Anzahl der gegebenen EKs und FFPs bis zur Aufnahme auf Intensivstation | 258 €          | 344 €           | 354 €           | 365 €           | 375 €           |
| + Falls schwere Abdominalverletzung (AIS ≥ 3)                            | 2.849 €        | 3.802 €         | 3.914 €         | 4.028 €         | 4.146 €         |
| + Falls instabile Beckenverletzung (AIS = 5)                             | 7.505 €        | 10.016 €        | 10.310 €        | 10.612 €        | 10.923 €        |
| + Falls schwere Extremitäten oder Beckenverletzung (AIS = 3-4)           | 2.418 €        | 3.227 €         | 3.322 €         | 3.419 €         | 3.519 €         |

Kalkulations der Multiplikatoren des Kostenschätzers im TraumaRegister DGU®. \* Prognostizierte Kosten.
