# Supplementary material for: Ist die Polytraumaversorgung im aG-DRG-System defizitär?
Source: Springer Nature journal article supplement (doi:10.1007/s00113-021-01015-5), 2021-06-08
Supplement: MOESM9 [file 19239702]

| DRG  | Fälle (n) | Behandlungs-<br>tage pro Fall | Kosten 2017 | Gesamterlös<br>2017 | Differenz<br>K/GE 2017 | Differenz<br>K/GE 2018 | Differenz<br>K/GE 2019 | Differenz<br>K/GE 2020 |
|------|-----------|-------------------------------|-------------|---------------------|------------------------|------------------------|------------------------|------------------------|
| W01B | 6         | 49,33                         | 49.214 €    | 50.298 €            | -1.083 €               | -1.321 €               | -1.778 €               | -1.892 €               |
| W01C | 6         | 24,33                         | 26.286 €    | 28.474 €            | 2.189 €                | 1.077 €                | 1.440 €                | 882 €                  |
| W02A | 4         | 64,31                         | 75.029 €    | 89.603 €            | 14.574 €               | 13.586 €               | 15.194 €               | 13.863 €               |
| W02B | 8         | 16,63                         | 19.337 €    | 15.501 €            | -3.836 €               | -5.200 €               | -5.258 €               | -5.817 €               |
| W04A | 4         | 8,63                          | 9.373 €     | 10.180 €            | 807 €                  | 1.685 €                | 1.888 €                | 1.714 €                |
| W04B | 7         | 11,71                         | 15.787 €    | 12.338 €            | -3.449 €               | -4.336 €               | -4.393 €               | -4.860 €               |
| W36Z | 5         | 35,4                          | 53.722 €    | 57.551 €            | 3.829 €                | 1.484 €                | 2.240 €                | 1.122 €                |
| W60Z | 14        | 2,07                          | 9.611 €     | 8.475 €             | -1.136 €               | -1.441 €               | -1.464 €               | -1.721 €               |
| W61A | 2         | 19,5                          | 13.129 €    | 7.064 €             | -6.065 €               | -1.527 €               | -6.735 €               | -7.191 €               |
| W61B | 3         | 10,67                         | 9.928 €     | 5.450 €             | -4.478 €               | -4.495 €               | -4.633 €               | -4.974 €               |

Subgruppen Analyse der Patienten in der Polytrauma-DRG MCD 21A. K – Kosten; GE – DRG-Gesamterlös.

\* Prognostizierte Kosten.
